# Supplementary material for: Influence of organic ligands on the stoichiometry of magnetite nanoparticles
Source: Royal Society of Chemistry journal article supplement (doi:10.1039/d3na00240c), 2023-01-01
Supplement: d3na00240c1.pdf [file d3na00240c1.pdf]

## Supporting information

### Influence of organic ligands on the stoichiometry of magnetite nanoparticles

Phoomipat Jungcharoen<sup>1,2</sup>, Rémi Marsac<sup>1</sup>, Fadi Choueikani<sup>3</sup>, Delphine Masson,<sup>1</sup> Mathieu Pédrot<sup>1\*</sup>

<sup>1</sup> Univ Rennes, CNRS, Géosciences Rennes – UMR 6118, F-35000 Rennes, France

<sup>2</sup> Department of Environmental Engineering, Faculty of Engineering and Research Center for Environmental and Hazardous Substance Management, Khon Kaen University, Khon Kaen 40002, Thailand

<sup>3</sup> Synchrotron SOLEIL, L'ormes des Merisiers, Saint Aubin BP48, 91192 Gif sur Yvette cedex, France

\* Corresponding author: E-mail: [mathieu.pedrot@univ-rennes1.fr](mailto:mathieu.pedrot@univ-rennes1.fr)

#### Content:

**2 tables, 4 figures**

**Table S1.** Effective Fe(II)/Fe(III) ratio ( $R_{\text{eff}}$ ) obtained from chemical analysis and average particle size by TEM for stoichiometric nanomagnetite (R0.5) and oxidized products (R0.1), equilibrated at pH 8 during 20 days, in presence of citrate and EDTA at pH 8.

| Sample                | $R_{\text{eff}}$ in solid phase | Particle size by TEM (nm) | References                 |
|-----------------------|---------------------------------|---------------------------|----------------------------|
| <b>R0.1</b>           | $0.1 \pm 0.01$                  | $9.6 \pm 2.3$             | (Jungcharoen et al., 2022) |
| <b>R0.1 + citrate</b> | $0.1 \pm 0.03$                  | $9.2 \pm 1.4$             | Present work               |
| <b>R0.1 + EDTA</b>    | $0.1 \pm 0.03$                  | $9.5 \pm 1.4$             | Present work               |
| <b>R0.5</b>           | $0.5 \pm 0.01$                  | $11.5 \pm 1.5$            | (Jungcharoen et al., 2022) |
| <b>R0.5 + citrate</b> | $0.5 \pm 0.03$                  | $10.3 \pm 1.3$            | Present work               |
| <b>R0.5 + EDTA</b>    | $0.2 \pm 0.03$                  | $9.9 \pm 1.6$             | Present work               |

**Table S2.** Chemical reactions and corresponding equilibrium constants, which are absent from the “Minteq.v4” database of PHREEQC, but required for thermodynamic calculations. (1) calculated constants for 10 nm-sized magnetites according to Jungcharoen et al.<sup>1</sup>. (2) Silva et al.<sup>2</sup>. (3) Vukosav et al.<sup>3</sup>. (4) The reaction was omitted because it gave inconsistent results with the present experimental data. (Complete references are provided in the main text).

| <b>Reaction</b>                                                                                                           | <b>log K</b>            |
|---------------------------------------------------------------------------------------------------------------------------|-------------------------|
| $\text{Fe}_8\text{O}_{12} + 24 \text{H}^+ \rightleftharpoons 8 \text{Fe}^{3+} + 12 \text{H}_2\text{O}$                    | 15.49 <sup>(1)</sup>    |
| $\text{Fe}_9\text{O}_{12} + 24 \text{H}^+ \rightleftharpoons 6 \text{Fe}^{3+} + 3 \text{Fe}^{2+} + 12 \text{H}_2\text{O}$ | 35.23 <sup>(1)</sup>    |
| $\text{Citrate}^{4-} + \text{H}^+ \rightleftharpoons \text{CitrateH}^{3-}$                                                | 14.40 <sup>(2)</sup>    |
| $\text{CitrateH}^{3-} + \text{H}^+ \rightleftharpoons \text{CitrateH}_2^{2-}$                                             | 6.40 <sup>(2)</sup>     |
| $\text{CitrateH}_2^{2-} + \text{H}^+ \rightleftharpoons \text{CitrateH}_3^{-}$                                            | 4.76 <sup>(2)</sup>     |
| $\text{CitrateH}_3^{-} + \text{H}^+ \rightleftharpoons \text{CitrateH}_4$                                                 | 3.13 <sup>(2)</sup>     |
| $\text{Fe}^{3+} + \text{H}^+ + \text{Citrate}^{-} \rightleftharpoons \text{Fe(III)HCitrate}$                              | 25.69 <sup>(3)</sup>    |
| $\text{Fe}^{3+} + 2 \text{Citrate}^{-} \rightleftharpoons \text{Fe(III)Citrate}_2^{5-}$                                   | 36.27 <sup>(3)</sup>    |
| $\text{Fe}^{3+} + \text{H}^+ + 2 \text{Citrate}^{-} \rightleftharpoons \text{Fe(III)HCitrate}_2^{4-}$                     | 41.4 <sup>(3)</sup>     |
| $\text{Fe}^{3+} + 2 \text{H}^+ + 2 \text{Citrate}^{-} \rightleftharpoons \text{Fe(III)H}_2\text{Citrate}_2^{3-}$          | 47.46 <sup>(3)</sup>    |
| $\text{Fe}^{2+} + \text{H}^+ + \text{Citrate}^{-} \rightleftharpoons \text{Fe(II)HCitrate}^{-}$                           | 19.43 <sup>(3)</sup>    |
| $\text{Fe}^{2+} + \text{Citrate}^{-} \rightleftharpoons \text{Fe(II)Citrate}_2^{6-}$                                      | Not used <sup>(4)</sup> |

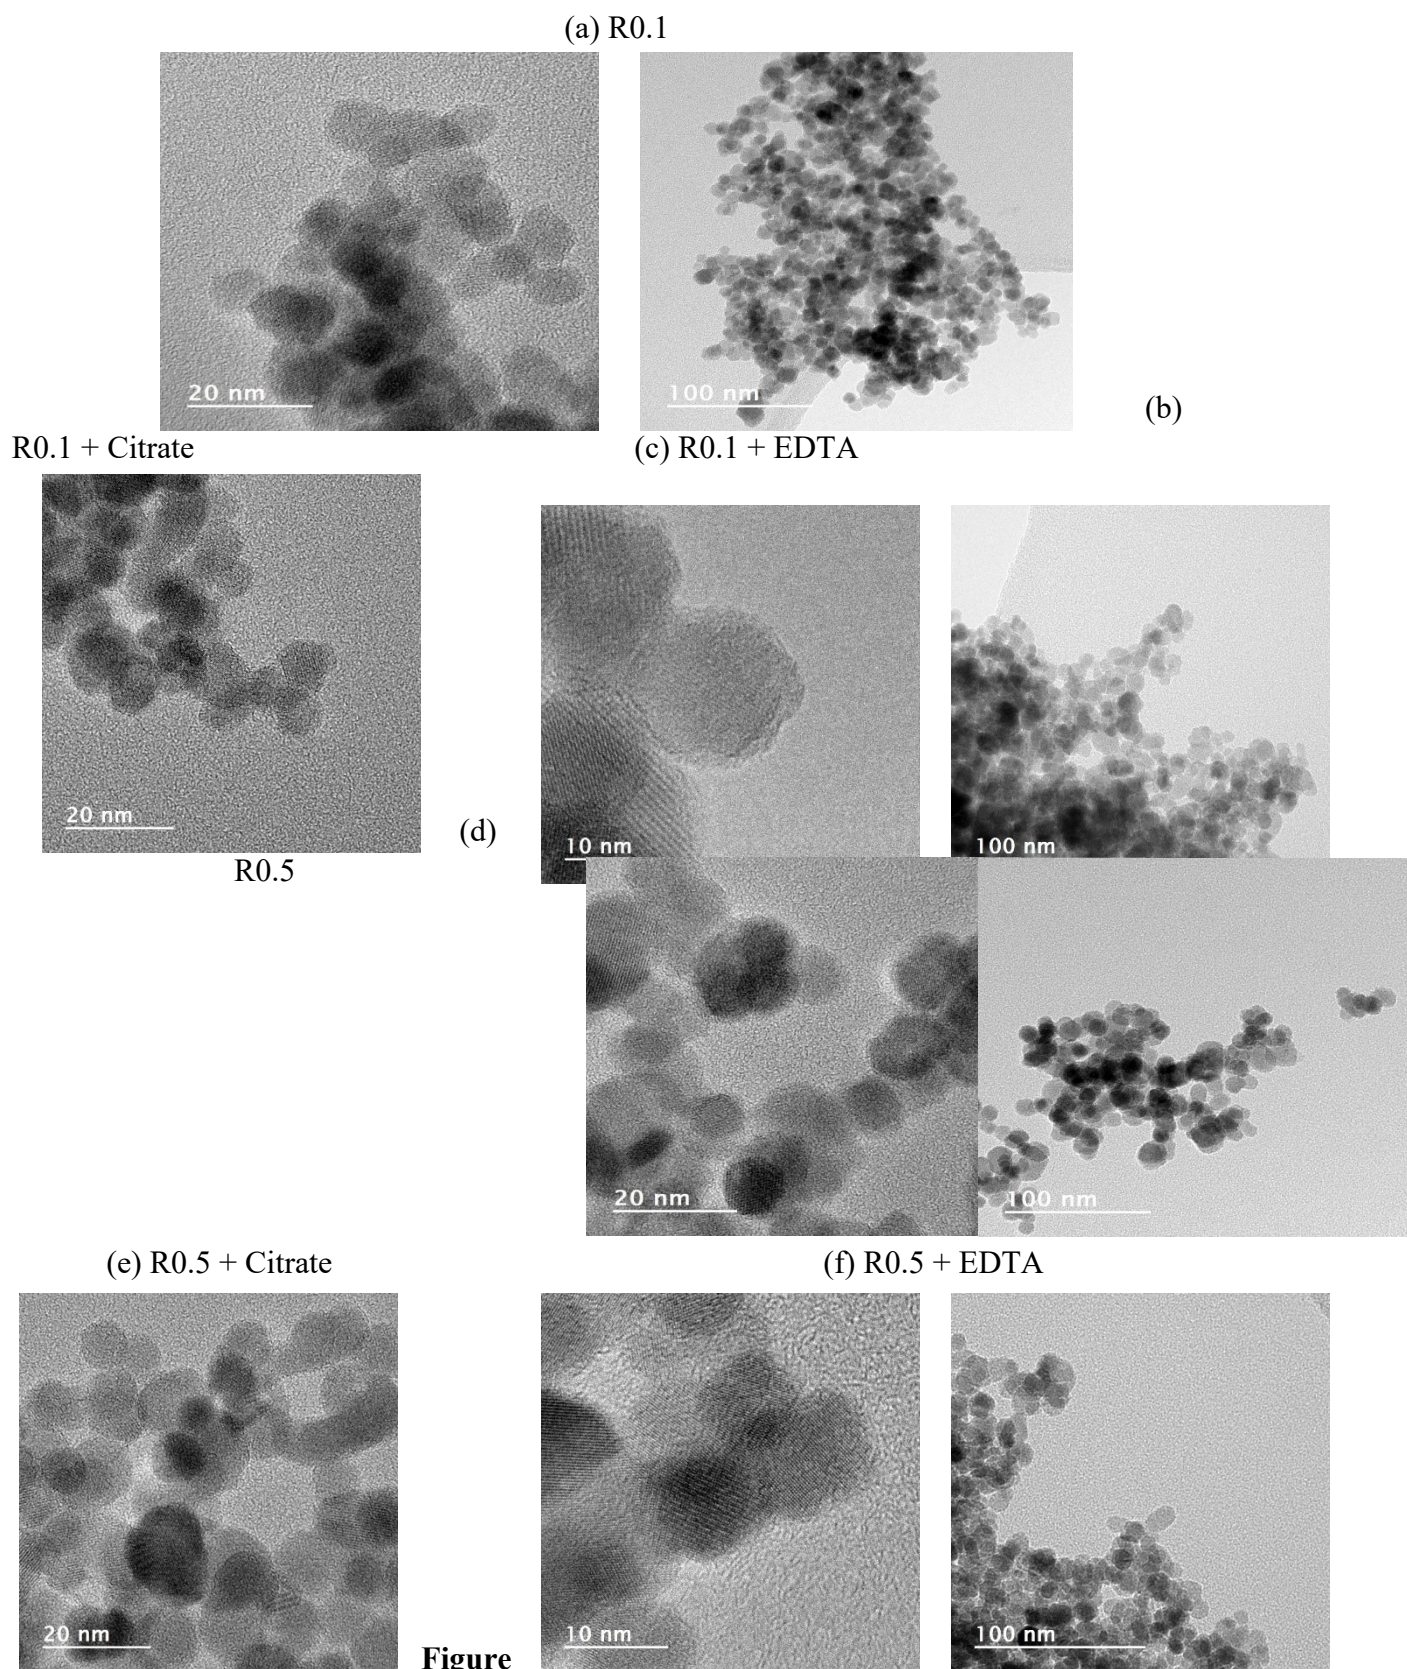

**Figure S1.** TEM images of oxidized products (R0.1) in absence (a) and presence of (b) citrate and (c) EDTA and stoichiometric nanomagnetite (R0.5) in absence (d) and presence of (e) citrate and (f) EDTA.

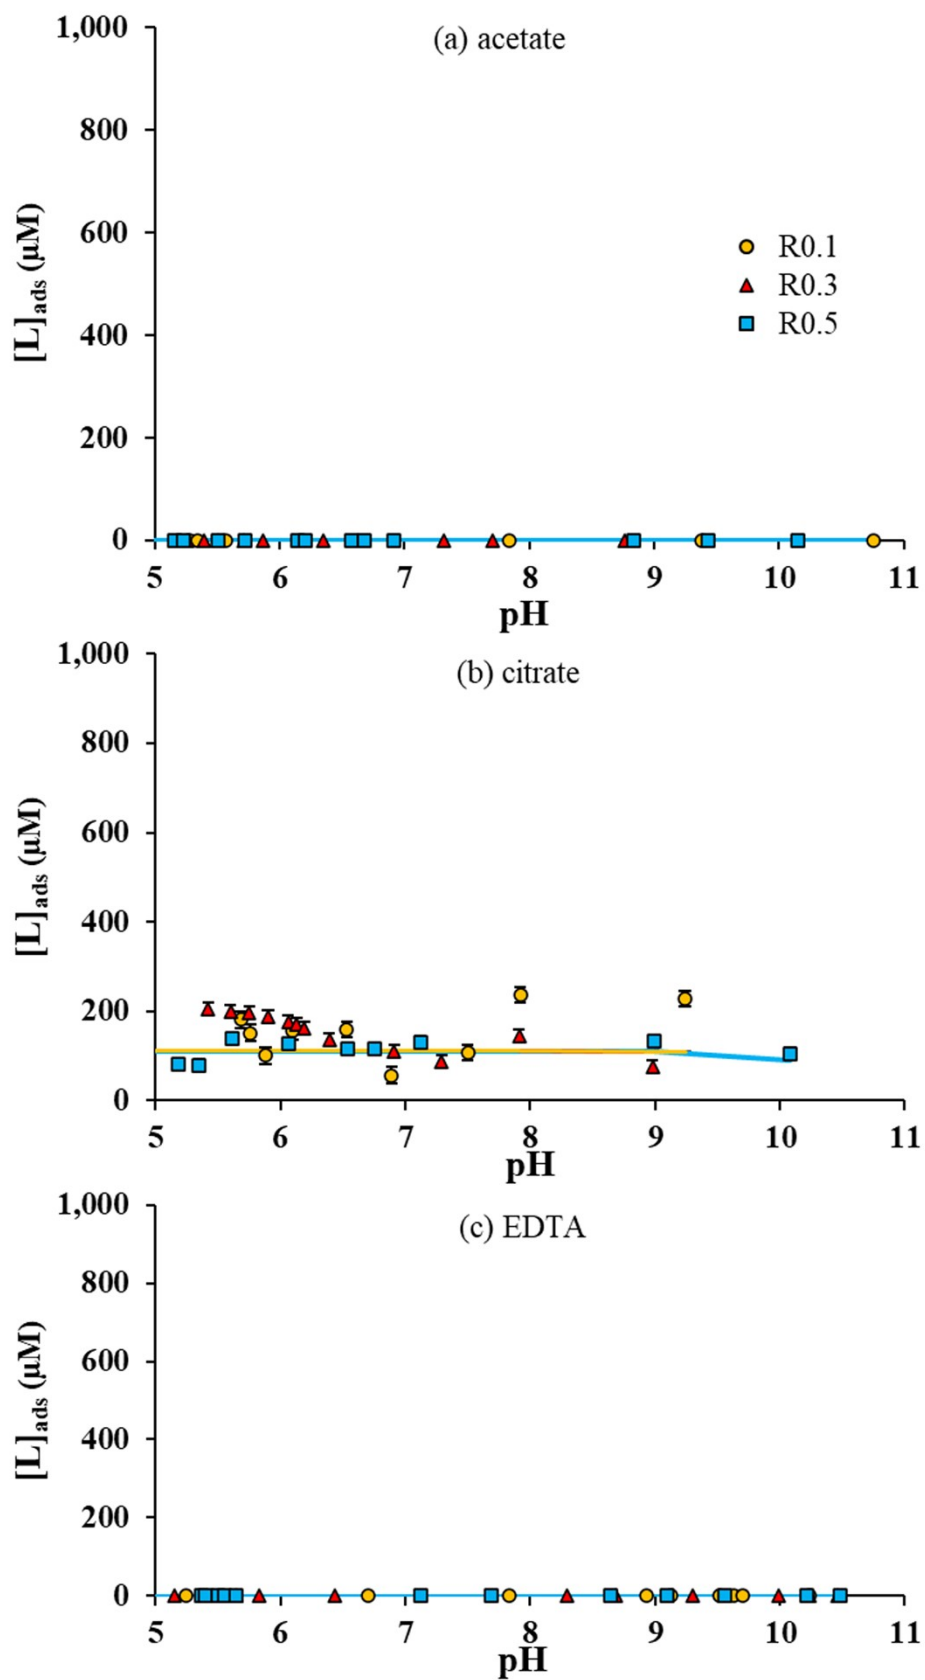

**Figure S2.** Adsorption of ligands ( $[L]_{ads}$ ) (a) acetate, (b) citrate and (c) EDTA on magnetite nanoparticles as a function of pH for R0.1, R0.3, and R0.5 in presence of 1 mM of (a) acetate,

(b) citrate, and (c) EDTA in 10 mM NaCl. Lines correspond to surface complexation modelling results (only for citrate).

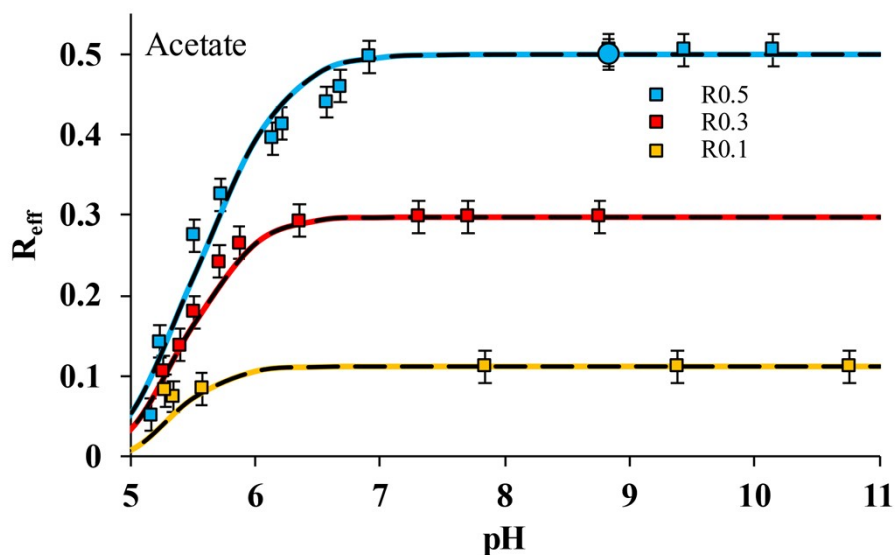

**Figure S3.**  $R_{\text{eff}}$  versus pH in the absence (black dashed line) and presence of acetate and magnetites with different initial stoichiometries (R0.1, R0.3 and R0.5) in 10 mM NaCl (symbols). The data represented by a large cycle symbol was determined by XMCD. Colored lines correspond to magnetite-maghemite solid solution modelling results.

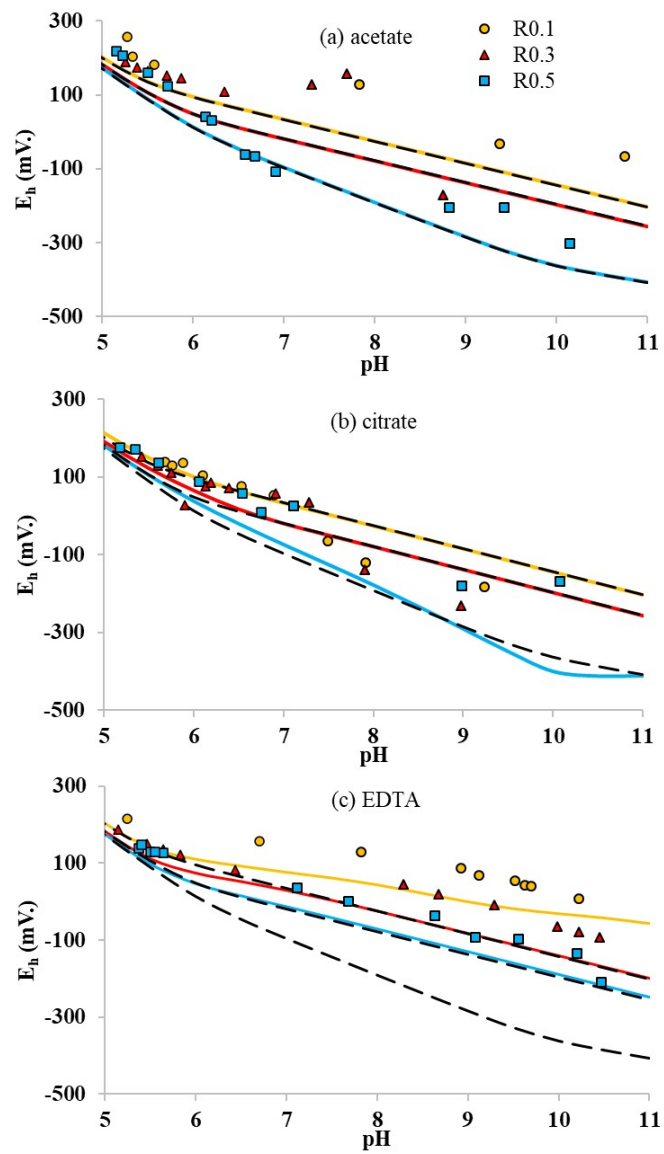

**Figure S4.**  $E_h$  as a function of pH for R0.1, R0.3, and R0.5 in absence (black dashed line) and presence of 1 mM of acetate, citrate, and EDTA in 10 mM NaCl (symbols). Colored lines correspond to magnetite-maghemite solid solution modelling results.

## References

- (1) Jungcharoen, P.; Pédrot, M.; Heberling, F.; Hanna, K.; Choueikani, F.; Catrouillet, C.; Dia, A.; Marsac, R. Prediction of Nanomagnetite Stoichiometry (Fe(II)/Fe(III)) under Contrasting PH and Redox Conditions. *Environ. Sci.: Nano* **2022**, *9* (7), 2363–2371. <https://doi.org/10.1039/D2EN00112H>.
- (2) Silva, A. M. N.; Kong, X.; Hider, R. C. Determination of the PKa Value of the Hydroxyl Group in the  $\alpha$ -Hydroxycarboxylates Citrate, Malate and Lactate by  $^{13}\text{C}$  NMR: Implications for Metal Coordination in Biological Systems. *Biometals* **2009**, *22* (5), 771–778. <https://doi.org/10.1007/s10534-009-9224-5>.
- (3) Vukosav, P.; Mlakar, M.; Tomišić, V. Revision of Iron(III)–Citrate Speciation in Aqueous Solution. Voltammetric and Spectrophotometric Studies. *Analytica Chimica Acta* **2012**, *745*, 85–91. <https://doi.org/10.1016/j.aca.2012.07.036>.
